# Supplementary material
Source: PubMed Central journal article supplement (PMC2099674)
Supplement: bjpg57-662TableS1.pdf [file bjpg57-662TableS1.pdf]

Supplementary Table 1. Components of trial methodology score

| First author               | A | B | C  | D | E | F | G  | H | I | J | K | L  | M | N | O | Score |
|----------------------------|---|---|----|---|---|---|----|---|---|---|---|----|---|---|---|-------|
| Van de Windt <sup>35</sup> | 4 | 5 | 10 | 4 | 6 | 4 | 10 | 1 | 4 | 0 | 4 | 10 | 1 | 4 | 8 | 70.5  |
| De Jong <sup>33</sup>      | 2 | 5 | 5  | 4 | 6 | 1 | 11 | 3 | 4 | 4 | 4 | 10 | 1 | 2 | 5 | 59.5  |
| Jacobs <sup>30</sup>       | 4 | 0 | 0  | 4 | 6 | 0 | 10 | 1 | 0 | 4 | 4 | 10 | 5 | 2 | 5 | 55    |
| Gam <sup>34</sup>          | 4 | 0 | 0  | 6 | 6 | 4 | 10 | 0 | 0 | 0 | 4 | 8  | 2 | 4 | 5 | 54.5  |
| Winters <sup>32</sup>      | 2 | 5 | 5  | 6 | 2 | 0 | 10 | 1 | 0 | 2 | 2 | 4  | 2 | 2 | 8 | 49.5  |
| Richardson <sup>27</sup>   | 4 | 0 | 0  | 6 | 6 | 5 | 12 | 1 | 2 | 0 | 4 | 4  | 2 | 2 | 0 | 46.5  |
| Bulgen <sup>29</sup>       | 2 | 0 | 0  | 0 | 2 | 5 | 12 | 0 | 0 | 0 | 4 | 4  | 1 | 4 | 5 | 42    |
| Rizk <sup>31</sup>         | 2 | 0 | 0  | 6 | 0 | 2 | 8  | 0 | 0 | 0 | 2 | 4  | 1 | 4 | 2 | 34    |
| Williams <sup>28</sup>     | 0 | 0 | 0  | 0 | 0 | 0 | 2  | 1 | 0 | 0 | 0 | 6  | 0 | 2 | 0 | 15    |

(A) 2 points if target population is defined by means of explicit selection criteria; 2 points if selection restricted to a population homogenous for relevant prognostic markers (for example, duration of complaint, pain at night, radiating pain, prior treatment).

(B) 5 points if number generation and concealed allocation is used for treatment allocation.

(C) 5 points if smallest group is bigger than 25 patients immediately after randomisation; 10 points if more than 50 patients; 15 points if more than 75 patients.

(D) 2 points each if study groups are comparable at baseline for: duration of the complaint, baseline scores for outcome measures, age, number of relapses, radiating pain.

(E) 6 points if no patient withdrew after randomisation; 2 points if the number of drop-outs is presented for each study group separately; 4 additional points if reasons for withdrawal are specified for each study group separately.

(F) Loss-to-follow-up: 1 point if less than 20% in each group; 4 points if it is less than 10% in each group.

(G) 1 point for every adequately described feature of injection and reference treatment: treatment type, steroid type or modality, needle placement or application technique, intensity or solution, treatment number and frequency, compliance; 2 additional points if both placebo and pragmatic control included.

(H) 1 point if co-interventions are comparable between groups; 3 points if they are standardised or avoided in the study design.

(I) 2 points if blinding of patients was attempted; 2 additional points if blinding for treatment contrasts proved successful.

(J) 2 points if blinding of therapists was attempted; 2 additional points if blinding for treatment contrast proved successful.

(K) 2 points if blinding of observer was attempted; 2 additional points if blinding for treatment contrast proved successful.

(L) 2 points for every assessed outcome measure: pain, success rate, functional status/activities of daily living, mobility/range of motion, medical consumption/medication or surgery.

(M) 1 point for every blindly assessed outcome measure, see (L).

(N) 2 points if outcomes were assessed immediately after last treatment; 2 additional points if this was done 3 months or later after randomisation.

(O) 5 points if data for most important outcome measure on the most important moment of effect measurement are adequately presented (frequencies/mean and standard deviation/centiles); 3 additional points for an adequate analysis with adjustment for drop-outs, loss-to-follow-up, missing values, non-compliance, and co-interventions if appropriate.
